# Supplementary material
Source: Research Square preprint supplement (doi:10.21203/rs.3.rs-9656751/v1)
Supplement: Supplementary file 1 [file b3498602f1d63405f3ff446f.docx]

**Supplementary Files**

*Supplementary Figure 1: Relationship between the Derby Scale of Intrinsic Capacity and the Factor Score Sum from Campbell et al [Campbell 2022].*


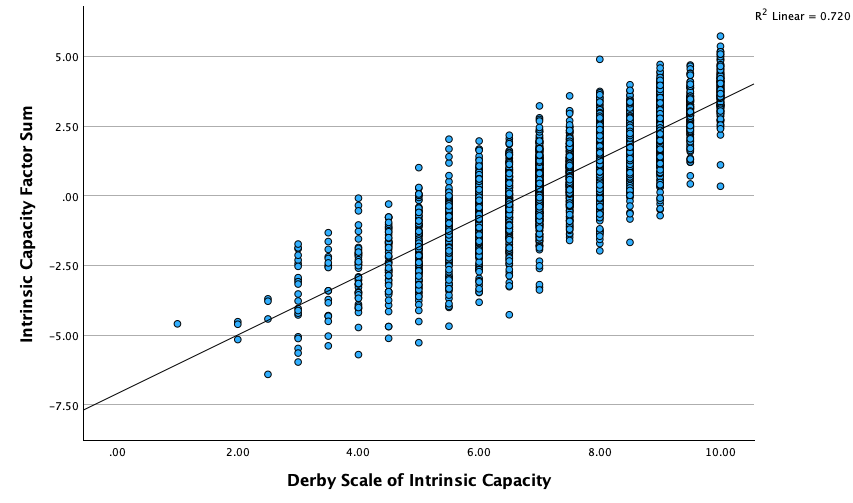


*Supplementary Table 1: The Derby Scale of Intrinsic Capacity (DSIC) scoring system. *Vision is corrected with refractive lens, if appropriate and Hearing is corrected with hearing aids, if appropriate*.

|  |  | **Score** | | | | |
| --- | --- | --- | --- | --- | --- | --- |
| **Domains** | **Items** | **0** | **0.5** | **1** | **2** | **Total** |
| **Locomotion** | **Short Physical Performance Battery** | 0-6 | - | 7-9 | 10-12 | 2 |
| **Vitality** | **Body Mass Index** | <18.5 or ³30 | - | 25-29.9 | 18.5-24.9 | 2 |
| **Sensory a)** | **Self-reported Vision*** | Poor or registered blind | Fair or Good | Very Good or Excellent | - | 1 |
| **Sensory b)** | **Self-reported Hearing*** | Poor | Fair or Good | Very Good or Excellent | - | 1 |
| **Psychology** | **Satisfaction with Life Scale** | 0-19 | - | 20-24 | 25-35 | 2 |
| **Cognition** | **Orientation 4 questions (day of the week, day of the month, month, year) and 10 word immediate recall** | Orientation <4 correct and 10 word recall 0-4 words | - | Orientation 4 correct and 10 word recall 0-4 words  *Or*  Orientation <4 correct and 10 word recall ³5 words | Orientation 4 correct and 10 word recall ³5 words | 2 |

*Supplementary Figure 2: Distribution of DSIC scores in the cohort from Wave 4.*


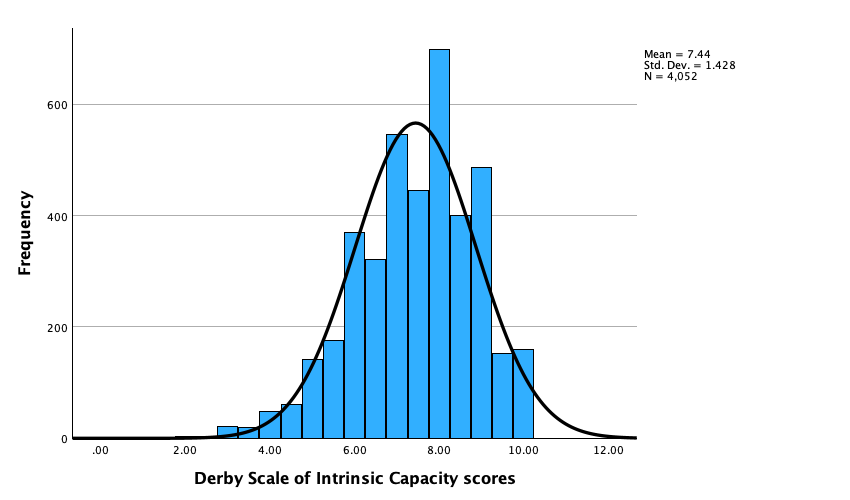


*Supplementary Table 2: Covariates No Pain vs Pain baseline*

|  | No Pain | Pain | OR (95% CI) | p-value |
| --- | --- | --- | --- | --- |
| Sex  Male (ref)  Female, n | 1317  1292 | 614  829 | 1.376 (1.209, 1.567) | <0.001 |
| Age*  Mean (SD) |  |  | 1.00 (0.99, 1.01) |  |
| Marital status  Married or in civil partnership (ref)  Separated, divorced, or never married | 1881  728 | 1028  415 | 1.043 (0.905, 1.203) | 0.562 |
| Employment  Employed (ref)  Semi retired or retired  Unable to work  Not working | 557  1891  14  147 | 259  1035  37  111 | 1.18 (0.99, 1.39)  5.68 (3.02, 10.70)  1.62 (1.22, 2.16) | 0.054  <0.001  <0.001 |
| Smoking (3251 missing)  No (ref)  Yes | 215  279 | 126  181 | 1.107 (0.829, 1.477) | 0.490 |
| Alcohol  No (ref)  1-4 days drinking in past week  5 or more days drinking in past week | 766  1147  680 | 497  614  325 | 0.825 (0.710, 0.958)  0.737 (0.619, 0.876) | 0.012  <0.001 |
| Education  Degree (ref)  Higher educational non-degree  A level or equivalent  O level or equivalent  No qualification | 509  439  187  849  611 | 198  213  104  477  443 | 1.247 (0.989, 1.573)  1.430 (1.069, 1.912)  1.444 (1.184, 1.762)  1.864 (1.519, 2.287) | 0.062  0.016  <0.001  <0.001 |
| Number of conditions  No long term conditions (ref)  1 or 2 long term conditions  3 or more long term conditions | 1121  1152  304 | 457  598  379 | 1.273 (1.099, 1.475)  3.058 (2.539, 3.683) | 0.001  <0.001 |
| Physical activity levels  High (ref)  Moderate  Low  Sedentary | 663  1468  419  57 | 233  758  396  55 | 1.469 (1.236, 1.747)  2.689 (2.196, 3.294)  2.746 (1.842, 4.094) | <0.001  <0.001  <0.001 |

**Exp(B) reported from linear regression analysis*

*Binary logistic regression used in all except for age. Each domain entered as covariate and the reference is the ‘best’ in the category. Interpretation is the odds for* ***having pain****. SO e.g. females are 1.38 times more likely than men to have pain compared to no pain.*

*Supplementary Table 3: Groups of trajectories of pain and associations with health and care outcomes*

|  | **Pain à Pain**  **N=533** | **Pain à No Pain**  **N=287** | **No Pain à Pain**  **N=380** | **No Pain à No Pain, n=1286** |
| --- | --- | --- | --- | --- |
| **Falls**  **Yes**  **OR (95% CI)** | 34% | 25.1% | 23.4% | 21.7% |
| 0.88 (0.77, 1.01) | 0.90 (0.74, 1.09) | 0.85 (0.72, 1.01) | 0.99 (0.89, 1.11) |
| **Any difficulty with ADL or IADL, Yes**  **OR (95% CI)** | 42.2% | 19.9% | 23.4% | 9.0% |
| 0.734 (0.642, 0.839) | 0.77 (0.62, 0.95) | 0.78 (0.66, 0.93) | 0.69 (0.59, 0.79) |
| **Informal help**  **Yes**  **OR (95% CI)** | 20.3% | 9.1% | 10.3% | 4.0% |
| 0.72 (0.62, 0.85) | 0.79 (0.59, 1.06) | 0.68 (0.54, 0.85) | 0.69 (0.56, 0.85) |
| **Formal help**  **Yes**  **OR (95% CI)** | 5.3% | 2.8% | 2.1% | 1.0% |
| 0.66 (0.50, 0.87) | 0.59 (0.35, 1.00) | 0.55 (0.35, 0.85) | 0.60 (0.40, 0.89) |

*Unadjusted Binary Logistic Regression of independent variable =baseline IC and dependent variable=adverse outcome, according to pain groups and the proportion of adverse outcome per group. Exp(B) reported as Odds Ratios.*

*Supplementary Table 4: Structural Equation Modelling values for ADL difficulties.*

|  | **Beta** | **SE** | **p-value** | **Standardised Beta** |
| --- | --- | --- | --- | --- |
| Number of ADL difficulties | | | | |
| DSIC at wave 6 | -0.07 | 0.02 | <0.001 | -0.12283 |
| Log Pain Severity | 0.485 | 0.129 | <0.001 | 0.131939 |
| Log Age | 0.597 | 0.59 | 0.312 | 0.035509 |
| Number of Comorbidities | 0.051 | 0.016 | 0.001 | 0.111859 |
| DSIC at wave 6 | | | | |
| Log Pain Severity | -0.955 | 0.283 | 0.001 | -0.11842 |
| Log Age | -6.494 | 1.279 | <0.001 | -0.17818 |
| Number of Comorbidities | -0.141 | 0.034 | <0.001 | -0.14553 |
| Log Pain Severity | | | | |
| Log Age | 0.028 | 0.159 | 0.859 | 0.00618 |
| Number of Comorbidities | 0.013 | 0.004 | 0.002 | 0.114053 |

*Supplementary Figure 3: Structural Equation Modelling of the effects of age and number of comorbidities on Instrumental Activities of Daily Living difficulties, moderated by pain and intrinsic capacity.*

*Figures stated on arrows are Standardised Beta. Only significant Standardised Beta values are shown, all p<0.01. Green arrows indicate a positive relationship, and orange arrows indicate an inverse relationship.*
